# Our work matters

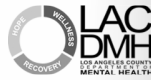

"At the end of the day, when you work with the DMH... your job is rewarding, you're helping the people who need it the most."

*Sarjack Mehta, MD  
General Psychiatrist*

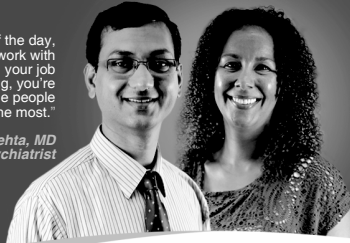

"DMH provides support for children and families who are often marginalized and underserved. Everyone deserves access to high quality mental health services, & I'm proud to be part of a system that is making that possible for families in Southern California."

*Kira Williams, MD  
Child Psychiatrist*

Join the largest, most dynamic mental health department in the nation. We are creating the future of mental health services, and we are seeking physicians who are ready to join our team and push the boundaries of traditional community practice.

To learn more about employment as a psychiatrist with the Los Angeles County Department of Mental Health, including salary and benefits, please visit:

[www.PsychiatristJobs.LA](http://www.PsychiatristJobs.LA)

## CHILD and CHIEF PSYCHIATRIST

Contractor: Seeking psychiatrist to provide services at LA Child Guidance Clinic. Work in a large children's mental health clinic affiliated with County + USC Medical Center's School of Child and Adolescent Psychiatry. Psychiatrists must possess and provide updated documentation of current, valid licenses or certificates.

Send current vitae and cover letter to:

[hr@lacgc.org](mailto:hr@lacgc.org)

**Human Resources Dep., or contact**

**Jackie Garcia**

**for further information**

**3031 S. Vermont Avenue**

**Los Angeles, CA 90007**

**EOE/ADA**

**FAX: 323-373-1946**

**TEL: 323-373-2400**

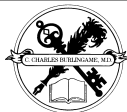

We are pleased to announce that **DAVID A. BRENT, M.D.** is the 2015 recipient of the **C. CHARLES BURLINGAME, M.D. AWARD** for his outstanding contributions to psychiatry.

### *Past Recipients*

- 1988 Robert Kellner, M.D., Ph.D.
- 1989 William T. Carpenter, Jr., M.D.
- 1990 Dennis P. Cantwell, M.D.
- 1991 George E. Vaillant, M.D.
- 1992 A. John Rush, M.D.
- 1993 John C. Nemiah, M.D.
- 1994 Maurice J. Martin, M.D.
- 1995 Otto F. Kernberg, M.D.
- 1996 Charles P. O'Brien, M.D., Ph.D.
- 1997 Glen Owen Gabbard, M.D.
- 1998 Lissy F. Jarvik, M.D., Ph.D.
- 1999 Nancy C. Andreasen, M.D., Ph.D.
- 2000 Lewis L. Judd, M.D.
- 2001 Paul S. Appelbaum, M.D.
- 2002 Charles B. Nemeroff, M.D., Ph.D.
- 2003 Dilip V. Jeste, M.D.
- 2004 David H. Barlow, Ph.D.
- 2005 Herbert D. Kleber, M.D.
- 2006 Daniel N. Stern, M.D.
- 2007 Jerrold F. Rosenbaum, M.D.
- 2008 K. Ranga Rama Krishnan, M.D.
- 2009 David J. Kupfer, M.D.
- 2010 Professor Sir Michael Rutter
- 2011 Jeffrey A. Lieberman, M.D.
- 2012 Judith L. Rapoport, M.D.
- 2013 Nora D. Volkow, M.D.
- 2014 Daniel R. Weinberger, M.D.

**Institute  
of Living**  
A Division of Hartford Hospital

200 Retreat Avenue  
Hartford, CT 06106  
1-800-673-2411

**Psychiatric Services** (ISSN |1075-2730; online version, 1557-9700) is published monthly by the American Psychiatric Association, editorial and executive office, 1000 Wilson Blvd., Suite 1825, Arlington, VA 22209-3901. Copyright © 2015 by the American Psychiatric Association. Printed in U.S.A. Periodicals postage paid at Arlington, VA, and at additional mailing offices. POSTMASTER: Send address changes to **Psychiatric Services, 1000 Wilson Blvd., Suite 1825, Arlington, VA 22209-3901.**

Exceptional Careers with  
**THE SALARY  
YOU  
DESERVE**

**Staff Psychiatrist**  
**\$233,196 - \$287,592** annual salary  
**Retention Bonus of \$10,000**  
**J-1 Waiver & H-1B Visa Sponsorship**

To learn more, please contact  
**Dr. John Lindgren** at **209.351.7225** or  
**Psychiatry.Jobs@cdcr.ca.gov**.  
For additional information, you may also visit  
**www.ChangingPrisonHealthCare.org**

We offer a 40-hour work week, highly competitive salary, a retirement plan that vests in only five years, and all of the security and benefits that come with State employment. Plus, **California State Prison, Sacramento** is located near family-friendly Folsom, a city that offers excellent schools and many activities including expansive bike trails, boating on Folsom Lake, and shopping at upscale boutiques.

Generous benefits include:

- Medical (several choices)
- Dental
- Vision
- Sick Leave (12 days/year)
- Vacation (10 days/year)
- Holidays (additional 13 days/year)
- CME Leave (56 hours/year)
- CME Stipend
- Retirement Stipend (vests in 5 years)
- 4-day work week

California Department of Corrections & Rehabilitation

Ad#S7-SAC EOE

There's So Much More to **PSYCHIATRIC SERVICES**  
Than Meets the Page!

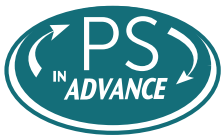

### Psychiatric Services in Advance Latest research reports!

#### **Illness Self-Management Programs: A Selection Guide**

The authors review evidence for the effectiveness of five of the most popular programs and describe distinctive features of each program to help administrators and others make informed choices about which to implement.

#### **Implementing Routine Behavioral Health Screening for Children**

When a public health system in Massachusetts implemented routine behavioral health screening for children, it also colocated social workers in its primary care clinics. The change led to increases in behavioral health treatment and, inexplicably, emergency department visits.

#### **Revisit the field's rich history!**

##### **50 Years Ago in Psychiatric Services**

- Departure Center Eases Discharge
- Hospital Patients Form Jaycee Club
- The Negative Image of the Psychiatric Record

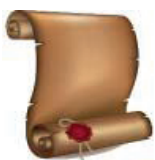

AMERICAN  
**PSYCHIATRIC  
ASSOCIATION**  
PUBLISHING

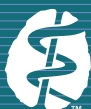

**ps.psychiatryonline.org**

www.appi.org • 1-800-368-5777 • Fax: 703-907-1091 • Email: appi@psych.org

Priority Code AH1520

# DSM-5

## SELECTIONS

### DSM-5® Selections

American Psychiatric Association

These selections provide a comprehensive overview of the process of diagnosing disorders while serving as a reference guide to assist in the diagnosis of individual patients. The disorder-specific resource is an invaluable addition to the DSM-5® collection and an important contribution to the mental health profession.

This book contains the critical disorder-specific content from these four titles:

- Diagnostic and Statistical Manual of Mental Disorders, Fifth Edition (DSM-5®)
- DSM-5® Clinical Cases
- DSM-5® Self-Exam Questions
- DSM-5® Guidebook

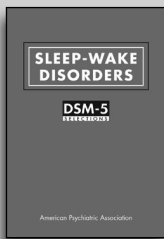

*Just Published!*

#### **Sleep-Wake Disorders** DSM-5® Selections

2015 • 160 pages  
ISBN 978-1-61537-009-2  
Paperback • \$39.00  
Item #37009

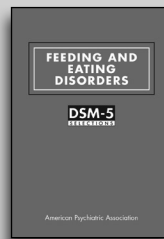

*Coming August 2015!*

#### **Feeding and Eating Disorders** DSM-5® Selections

2016 • 81 pages  
ISBN 978-1-61537-012-2  
Paperback • \$39.00  
Item #37012

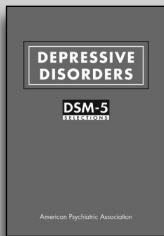

*Just Published!*

#### **Depressive Disorders** DSM-5® Selections

2015 • 118 pages  
ISBN 978-1-61537-010-8  
Paperback • \$39.00  
Item #37010

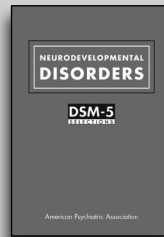

*Coming September 2015!*

#### **Neurodevelopmental Disorders** DSM-5® Selections

2016 • 161 pages  
ISBN 978-1-61537-013-9  
Paperback • \$39.00  
Item #37013

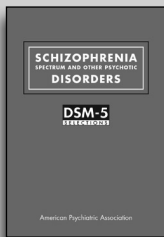

*Coming July 2015!*

#### **Schizophrenia Spectrum and Other Psychotic Disorders** DSM-5® Selections

2015 • 116 pages  
ISBN 978-1-61537-011-5  
Paperback • \$39.00  
Item #37011

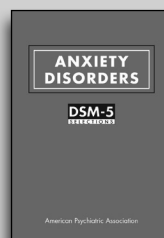

*Coming October 2015!*

#### **Anxiety Disorders** DSM-5® Selections

2016 • 110 pages  
ISBN 978-1-61537-014-6  
Paperback • \$39.00  
Item #37014

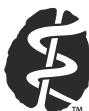

Source: https://ps.psychiatryonline.org/doi/suppl/10.1176/ps.2015.66.issue-7/suppl_file/back.pdf
